# Supplementary material for: Chemically driven dimensionality modulation of hybrid tin(ii) halide perovskite microcrystals
Source: Royal Society of Chemistry journal article supplement (doi:10.1039/d4tc00623b), 2024-01-01
Supplement: d4tc00623b1.pdf [file d4tc00623b1.pdf]

## Supporting Information

### **Chemically driven dimensionality modulation on hybrid tin (II) halide perovskites microcrystals**

Raúl I. Sánchez- Alarcón<sup>1</sup>, Omar E. Solís<sup>1</sup>, María Cristina Momblona-Rincon<sup>1</sup>, Teresa S. Ripolles\*<sup>1</sup>, Juan P. Martínez-Pastor<sup>1</sup>, Rafael Abargues<sup>1</sup>, Pablo P. Boix\*<sup>2,1</sup>

<sup>1</sup>*Instituto de Ciencia de los Materiales- Universidad de Valencia, Catedrático José Beltrán, 2, 46071, Valencia, Spain.*

<sup>2</sup>*Instituto de Tecnología Química, Instituto de Tecnología Química, Universitat Politècnica València-Consejo Superior de Investigaciones Científicas, Av. dels Tarongers, 46022 València, Spain.*

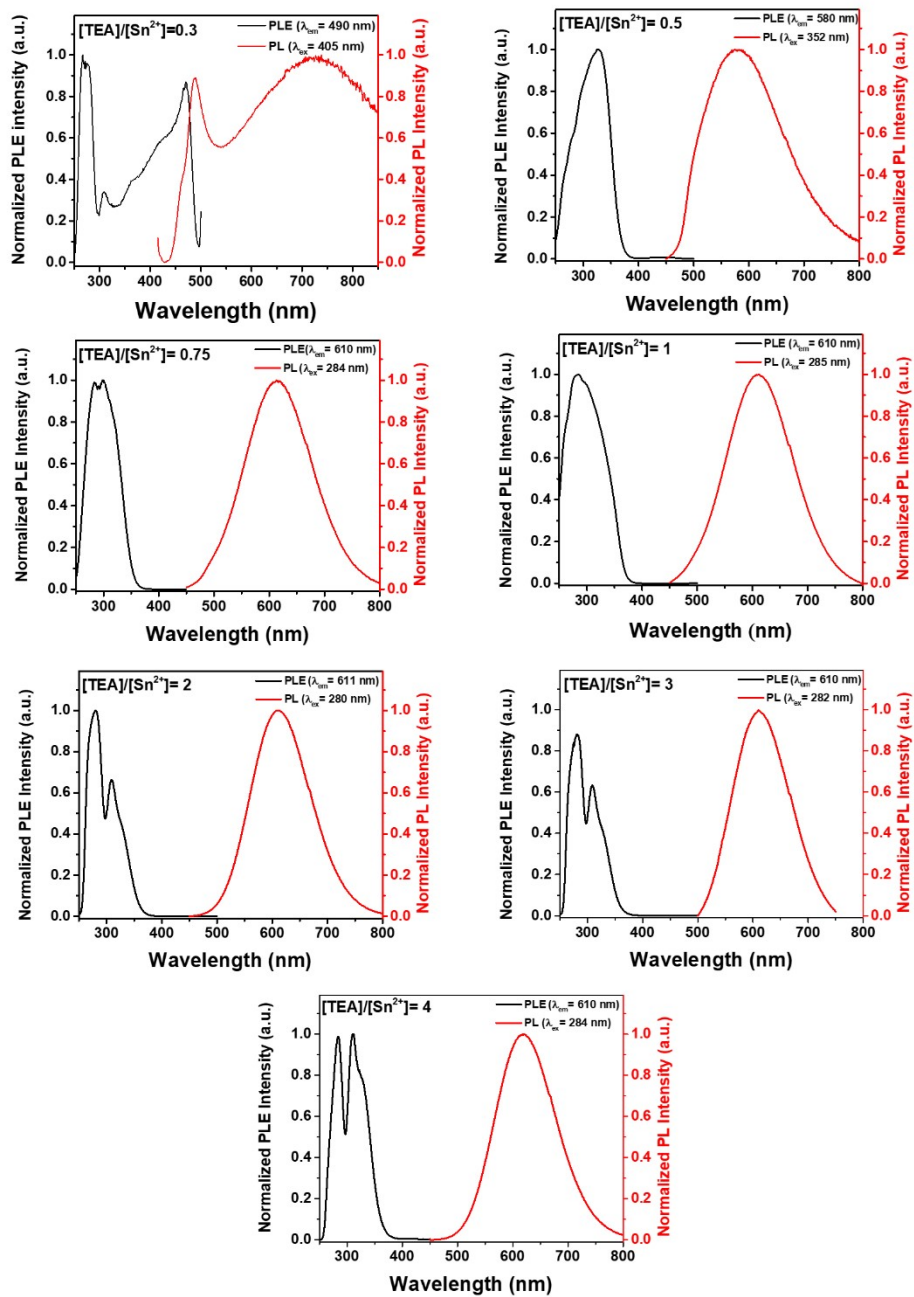

**Figure S1.** PL and PLE spectra from 0D-  $TEA_4SnBr_6$  and 2D-  $TEA_2SnBr_4$  synthesized at different molar ratios  $[TEA]/[Sn^{2+}]$ , such as 0.3, 0.5, 0.75, 1, 2, 3, and 4.

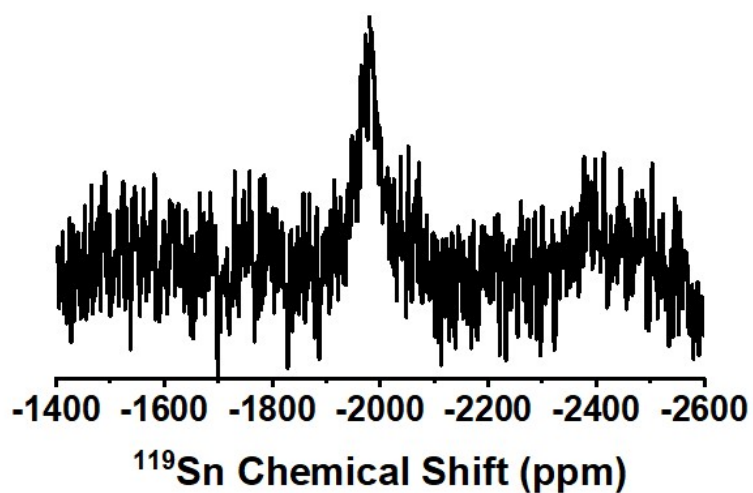

**Figure S2.**  $^{119}\text{Sn}$  MAS- NMR measurements of 2D-  $\text{TEA}_2\text{SnBr}_4$  samples carried out at high field.

**Table S1.** EDS microanalysis of TEA based tin (II) halide microcrystals synthesized by HI method.

| Sample                             | Sn<br>(at. %) | S<br>(at. %) | X (Cl, Br, or I)<br>(at. %) | S/Sn<br>Ratio | X/Sn<br>Ratio |
|------------------------------------|---------------|--------------|-----------------------------|---------------|---------------|
| $[\text{TEASnCl}_3][\text{TEACl}]$ | 12.7          | 31.2         | 56.0                        | 2.45          | 4.40          |
| $\text{TEA}_2\text{SnBr}_4$        | 14.5          | 29.6         | 56.0                        | 2.04          | 3.86          |
| $\text{TEA}_4\text{SnBr}_6$        | 8.9           | 36.5         | 54.6                        | 4.10          | 6.13          |
| $\text{TEA}_2\text{SnI}_4$         | 13.2          | 34.3         | 52.5                        | 2.59          | 3.97          |

**Table S2.** PL wavelength emission and PLQY of 0D- [TEASnCl<sub>3</sub>][TEACl] samples synthesised at different molar ratios [TEA<sup>+</sup>]/[Sn<sup>2+</sup>] by hot-injection approach at 160 °C.

| Molar ratio [TEA]/[Sn <sup>2+</sup> ] | $\lambda_{\text{ex}}$ (nm) | $\lambda_{\text{em}}$ (nm) | PLQY (%) |
|---------------------------------------|----------------------------|----------------------------|----------|
| 4                                     | 277                        | 602                        | 4.37     |
| 3                                     | 277                        | 595                        | 25.02    |
| 2                                     | 277                        | 595                        | 20.03    |
| 1                                     | 277                        | 633                        | 11.75    |
| 0.5                                   | 277                        | 631                        | 13.54    |
| 0.3                                   | 277                        | 617                        | 13.04    |
| 0.25                                  | 277                        | 619                        | 14.51    |
| 0.125                                 | 277                        | 619                        | 14.77    |

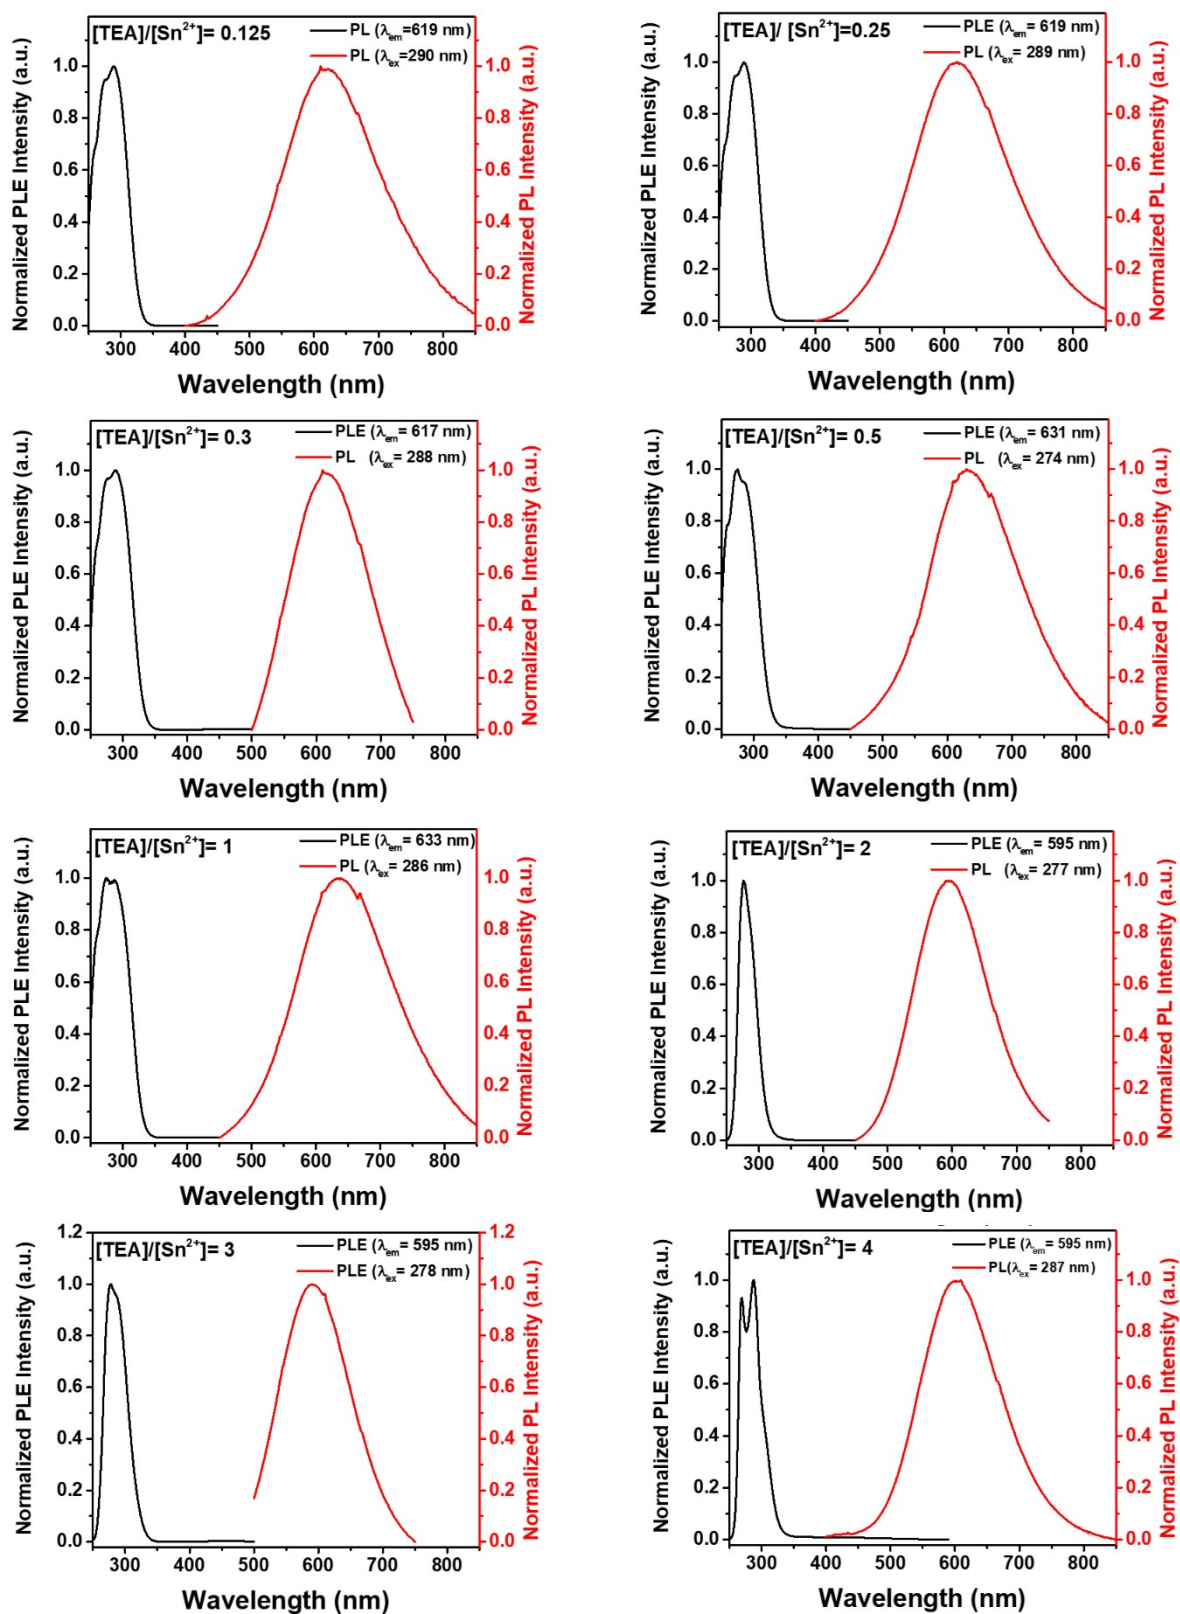

**Figure S3.** PL and PLE spectra of 0D-[TEASnCl<sub>3</sub>][TEACl] synthesized at different molar ratios of [TEA]/[Sn<sup>2+</sup>], such as 0.125, 0.25, 0.3, 0.5, 1, 2, 3, and 4.

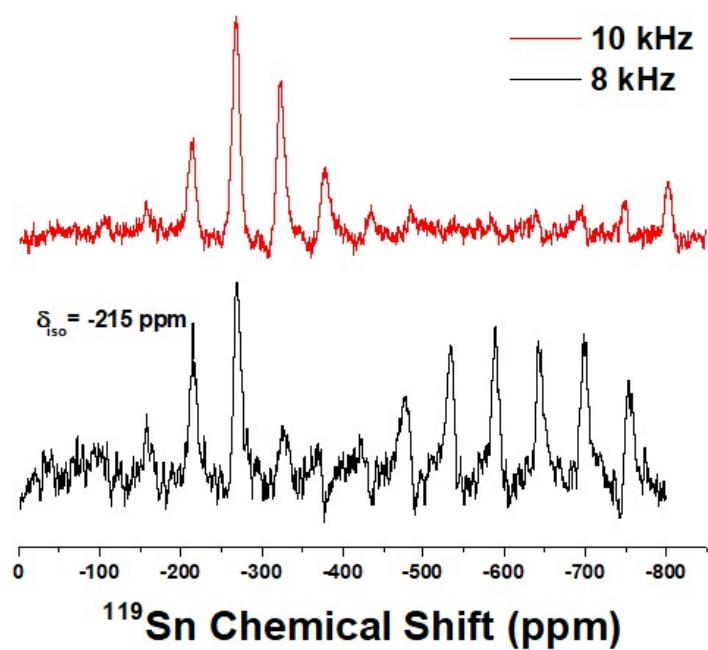

**Figure S4.**  $^{119}\text{Sn}$  MAS- NMR for 0D- [TEASnCl<sub>3</sub>][TEACl] microcrystals measured at different spinning rates.

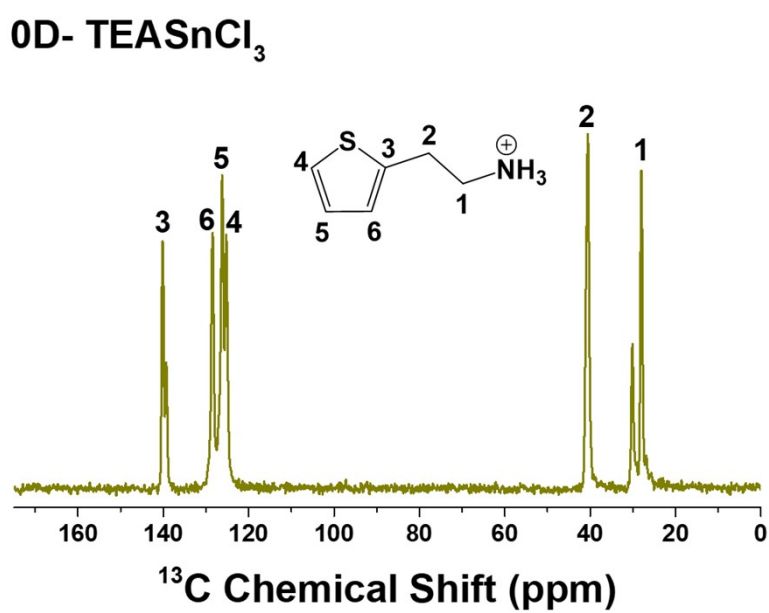

**Figure S5.**  $^{13}\text{C}$  MAS- NMR spectra of 0D- [TEASnCl<sub>3</sub>][TEACl] microcrystals samples.

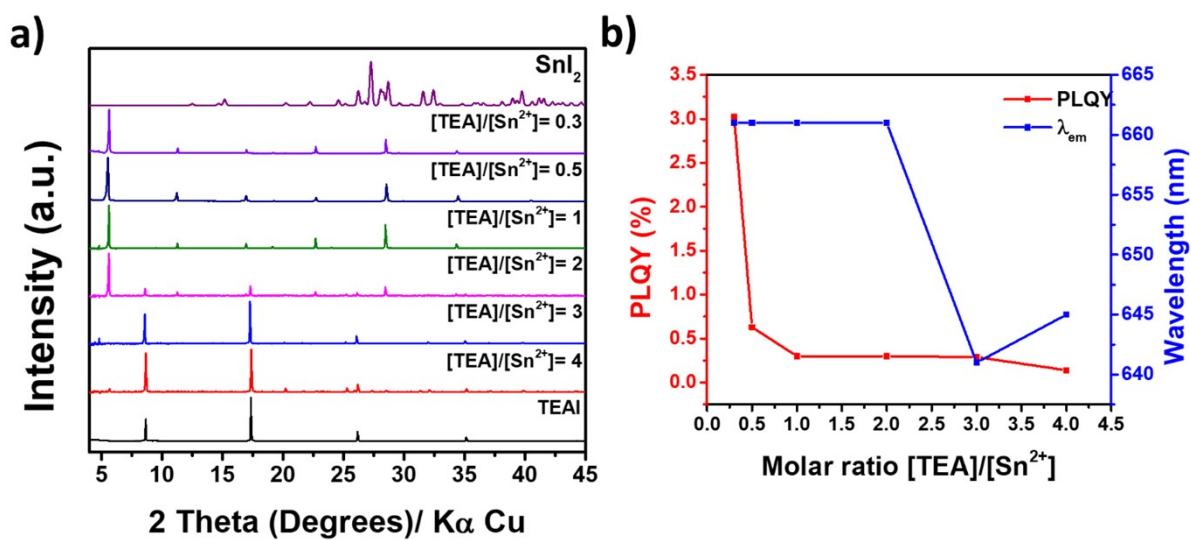

**Figure S6.** XRD patterns (a) and PLQY and PL wavelength emission (b) of 2D- TEA<sub>2</sub>SnI<sub>4</sub> samples synthesised at different molar ratio of precursors [TEA]/[Sn<sup>2+</sup>].

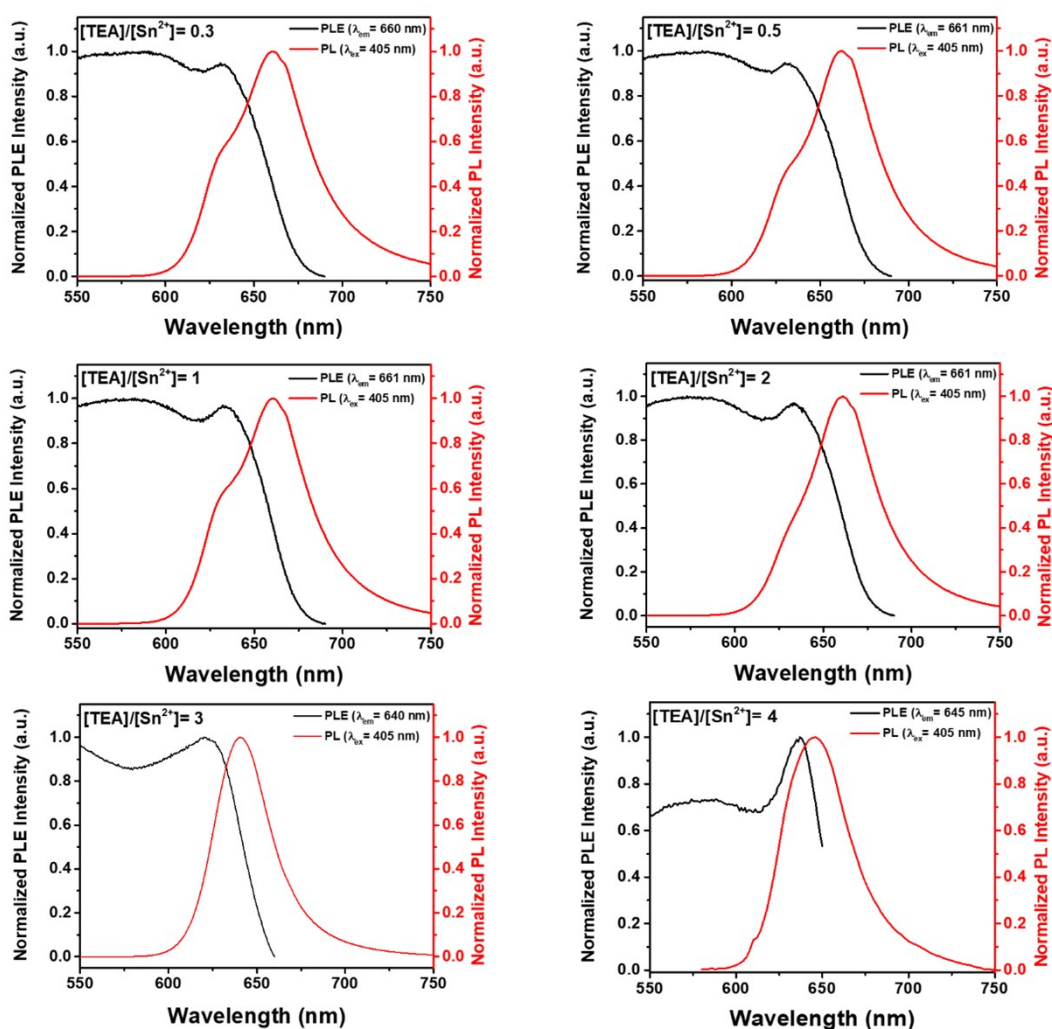

**Figure S7.** PL and PLE spectra of 2D- TEA<sub>2</sub>SnI<sub>4</sub> synthesized at different molar ratios of [TEA]/ [Sn<sup>2+</sup>], such as 0.3, 0.5, 1, 2, 3, and 4.

**Table S3.** PL wavelength emission and PLQY of 2D- TEA<sub>2</sub>SnI<sub>4</sub> samples synthesised at different molar ratios of [TEA]/[Sn<sup>2+</sup>] by hot-injection approach at 160 °C.

| <b>Molar ratio<br/>[TEA]/[Sn<sup>2+</sup>]</b> | <b><math>\lambda_{\text{ex}}</math> (nm)</b> | <b><math>\lambda_{\text{em}}</math> (nm)</b> | <b>PLQY (%)</b> |
|------------------------------------------------|----------------------------------------------|----------------------------------------------|-----------------|
| <b>4</b>                                       | 405                                          | 645                                          | 0.14            |
| <b>3</b>                                       | 405                                          | 641                                          | 0.29            |
| <b>2</b>                                       | 405                                          | 661                                          | 0.30            |
| <b>1</b>                                       | 405                                          | 661                                          | 0.30            |
| <b>0.5</b>                                     | 405                                          | 661                                          | 0.63            |
| <b>0.3</b>                                     | 405                                          | 661                                          | 3.02            |
